# Supplementary material
Source: PubMed Central journal article supplement (PMC2799759)
Supplement: 0910086106_0910086106SI.pdf [file 0910086106_0910086106SI.pdf]

# Supporting Information

Charles et al. 10.1073/pnas.0910086106

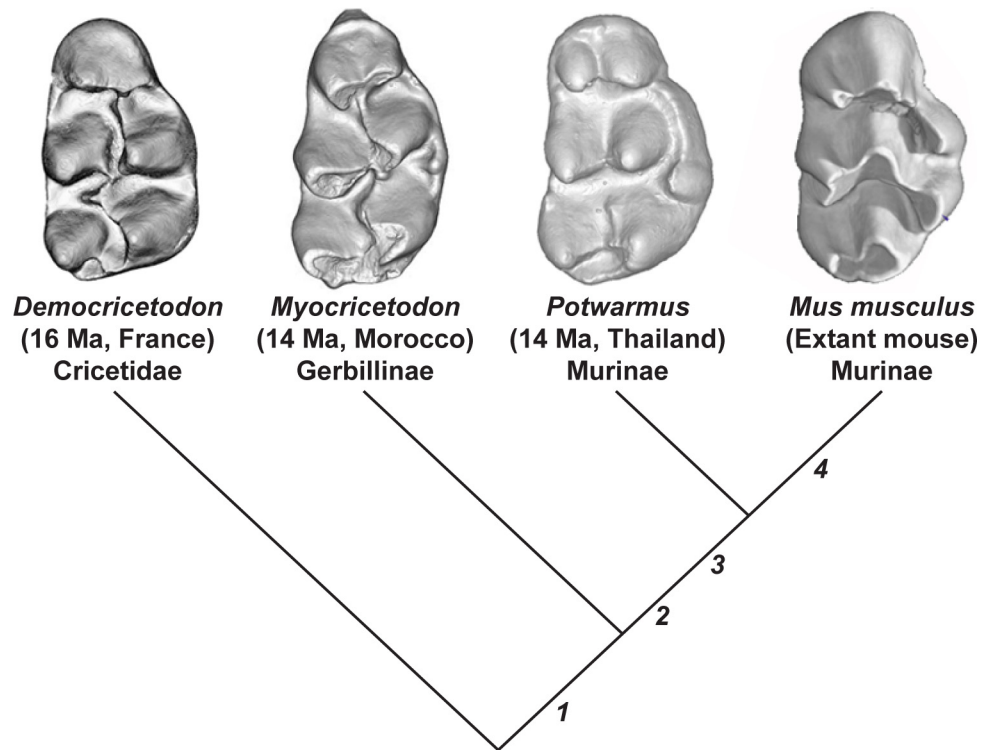

**Fig. S1.** Phylogenetic relationships of studied rodents. Each species is illustrated by its first upper molar morphology. The age and origin of fossils are indicated below the genus name. The subfamily of each fossil is also indicated. Numbers and black bars on the tree correspond to the main evolutionary events, as follows: (1) occurrence of a supplementary disto-lingual cusp; (2) loss of the mesio-distal crest; (3) occurrence of a mesio-lingual crest; (4) acquisition of the mesio-lingual cusp.
